# Supplementary material
Source: PubMed Central journal article supplement (PMC4974124)
Supplement: NIHMS784704-supplement-1.pdf [file NIHMS784704-supplement-1.pdf]

## Supplementary figures and legends

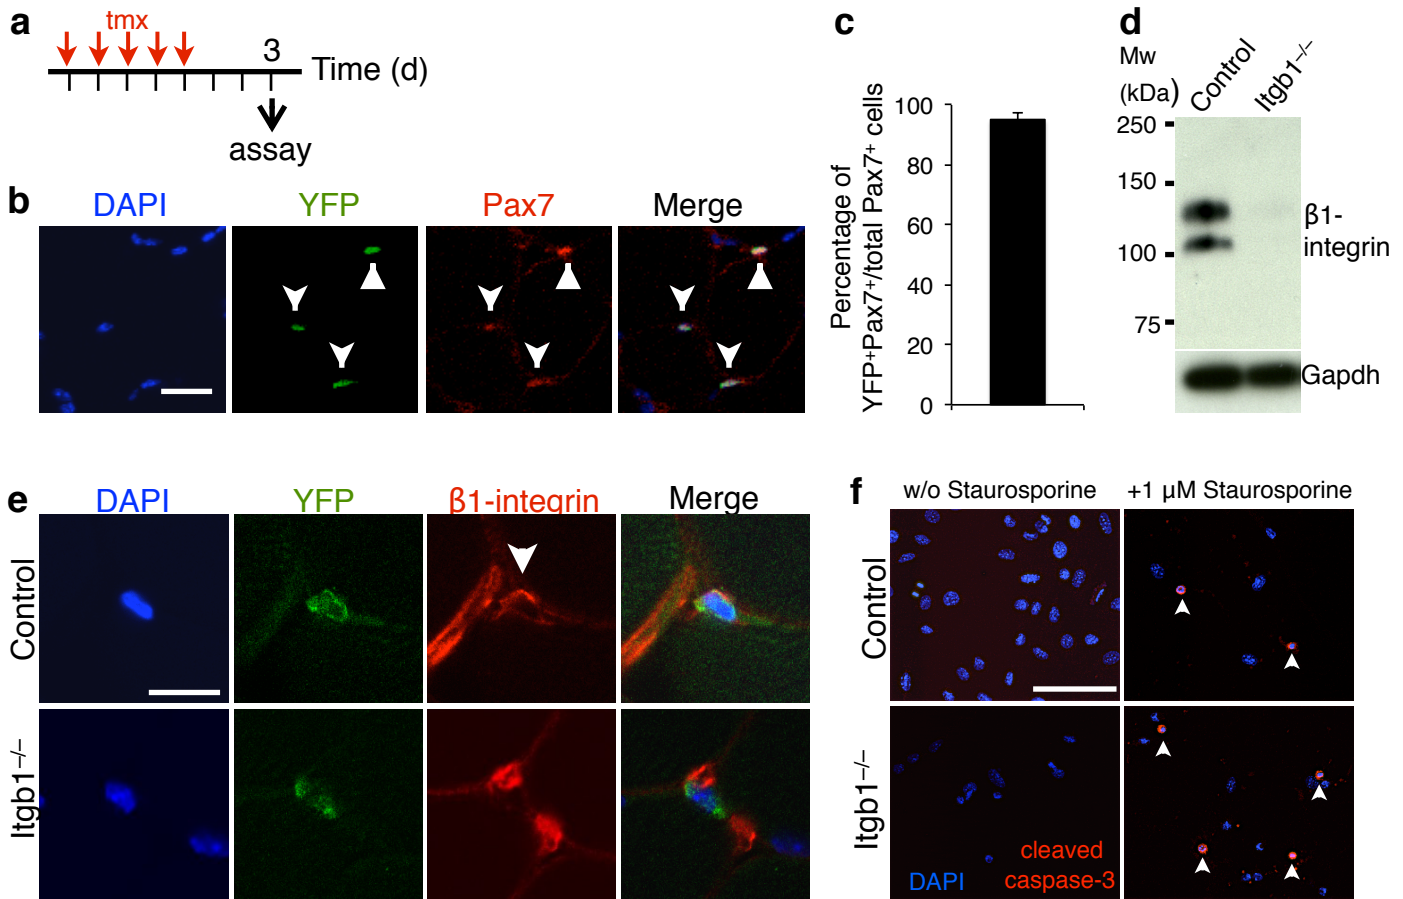

**Supplementary Fig. 1:  $\beta$ 1-integrin is specifically lost from Pax7<sup>+</sup> SCs.** (a) Tmx regimen and assay scheme for **Fig. 1a**; vertical lines indicate daily intervals. (b) SCs of control (*Pac7*<sup>CE/+</sup>; *R26R*<sup>YFP/YFP</sup>) animals stained for YFP and Pax7; arrowhead, YFP<sup>+</sup>Pax7<sup>+</sup> SC; scale bar = 50  $\mu$ m. (c) Percentage of YFP<sup>+</sup>Pax7<sup>+</sup> in total Pax7<sup>+</sup> SCs;  $n = 3$  animals, ten sections per animal. Efficiency of tmx-induced YFP<sup>+</sup> SC cell marking (95%) is comparable to that using the *R26R*<sup>LacZ</sup> reporter<sup>15</sup>. (d) Western blot of FACS isolated control and *Itgb1*<sup>-/-</sup> YFP<sup>+</sup> SCs (as in **Fig. 2c**). Two forms of  $\beta$ 1-integrin in control are detected; the lower band is presumably  $\beta$ 1D-integrin. Molecular weight (Mw, in kDa) is indicated. (e) YFP<sup>+</sup> (arrows) control and *Itgb1*<sup>-/-</sup> SCs *in vivo* also show removal of  $\beta$ 1-integrin in the mutant cell; scale bar = 20  $\mu$ m. Due to antibody cross-reactivity, laminin staining is not provided here; it is presented in **Fig. 1a**. (f) Control and *Itgb1*<sup>-/-</sup> myoblasts in growth media for 3 d, then without or with 1 mM staurosporine treatment for 3 h, and probed for cleaved caspase-3 immune-reactivity for PCD; scale bar = 50  $\mu$ m. Using this antibody *in vivo*, we did not find lineage marked mutant cells undergoing PCD. While we cannot formally exclude PCD as a partial mechanism for mutant SC reduction, we suggest it is not a major contributor.

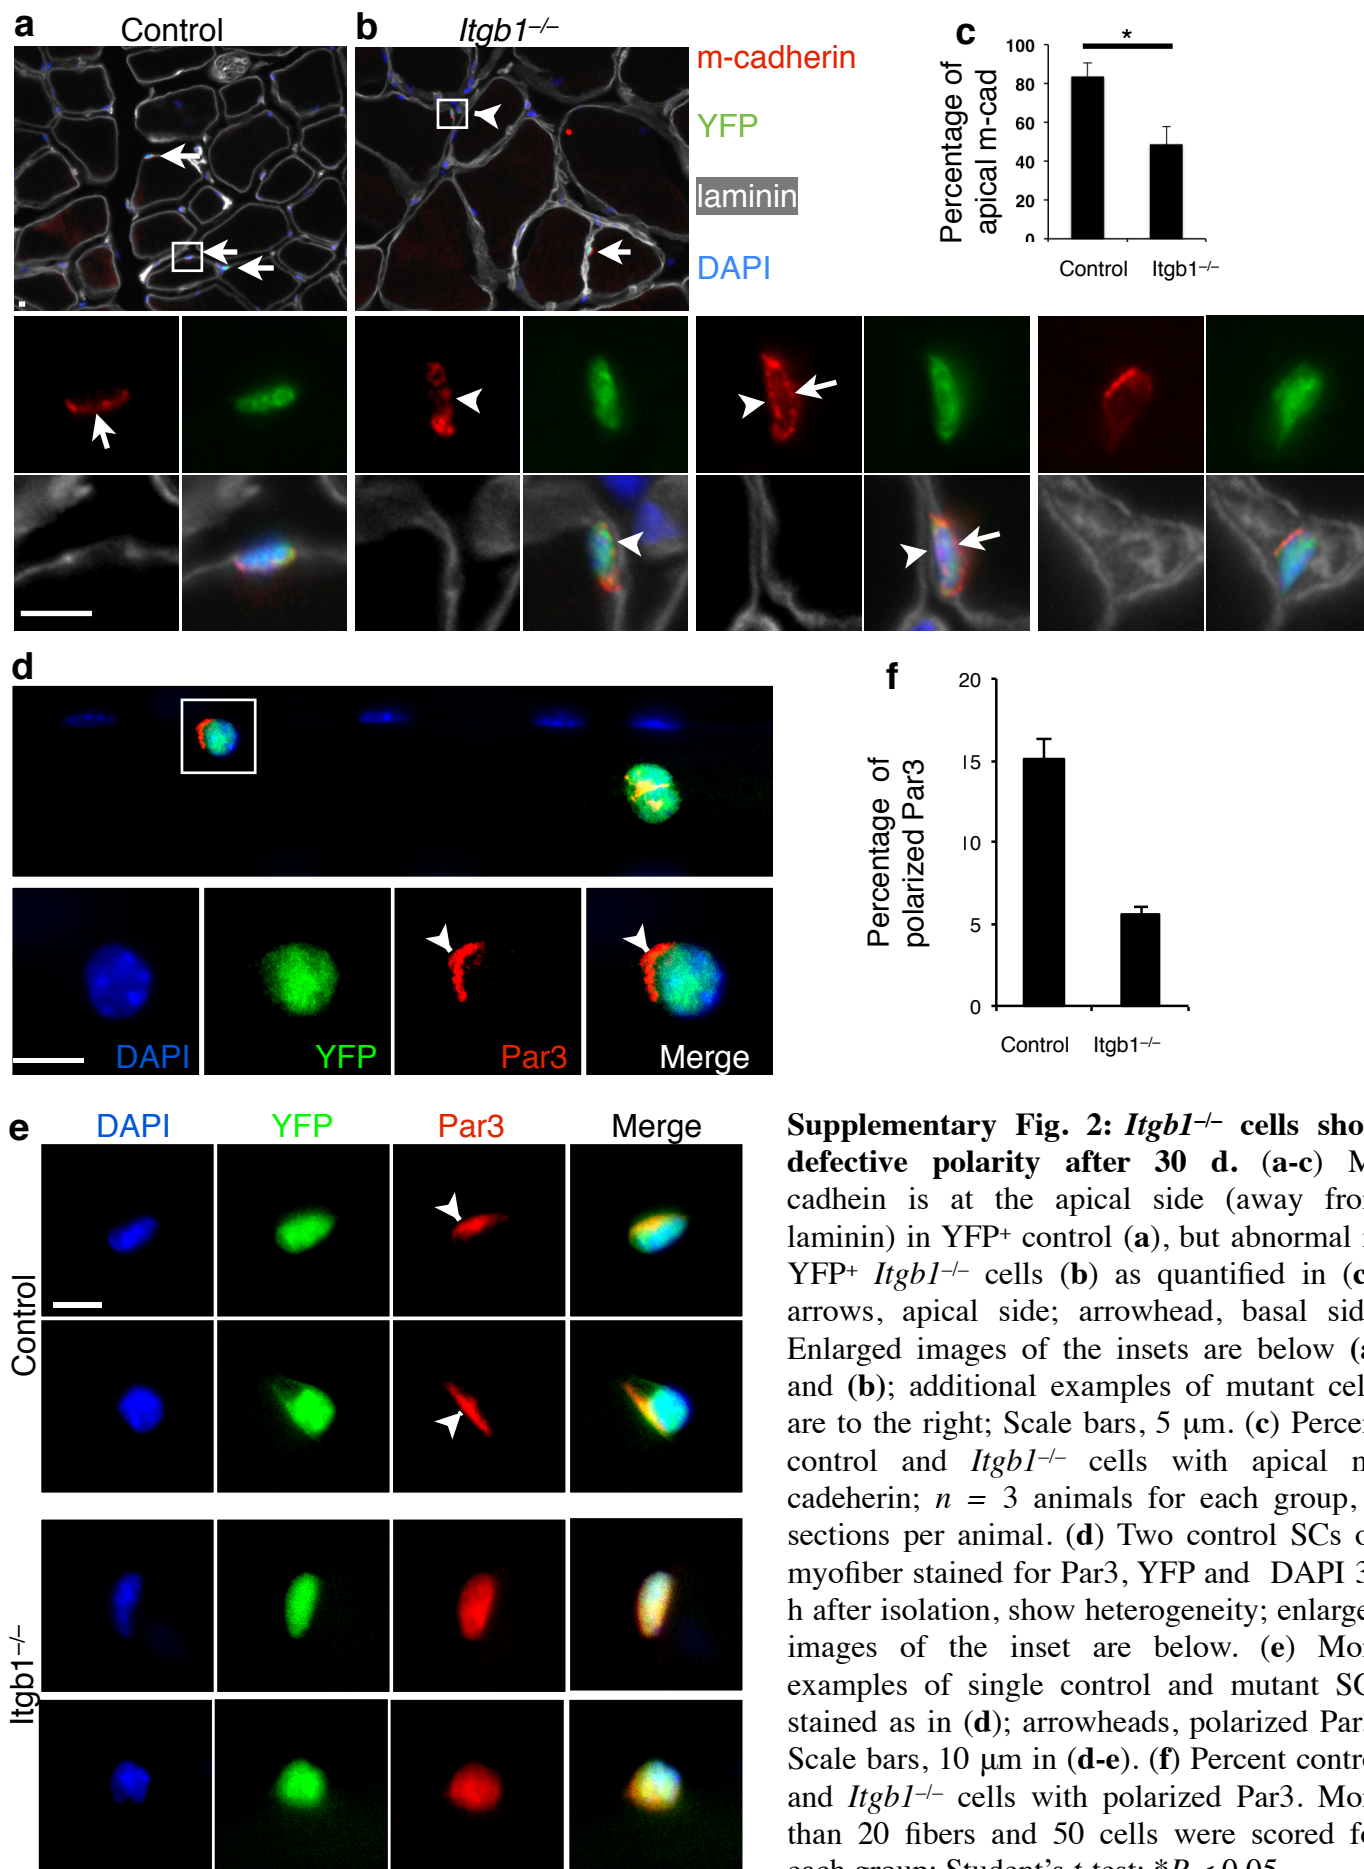

**Supplementary Fig. 2: *Itgb1*<sup>-/-</sup> cells show defective polarity after 30 d.** (a-c) M-cadherin is at the apical side (away from laminin) in YFP<sup>+</sup> control (a), but abnormal in YFP<sup>+</sup> *Itgb1*<sup>-/-</sup> cells (b) as quantified in (c); arrows, apical side; arrowhead, basal side. Enlarged images of the insets are below (a) and (b); additional examples of mutant cells are to the right; Scale bars, 5  $\mu$ m. (c) Percent control and *Itgb1*<sup>-/-</sup> cells with apical m-cadherin;  $n = 3$  animals for each group, 5 sections per animal. (d) Two control SCs on myofiber stained for Par3, YFP and DAPI 30 h after isolation, show heterogeneity; enlarged images of the inset are below. (e) More examples of single control and mutant SCs stained as in (d); arrowheads, polarized Par3; Scale bars, 10  $\mu$ m in (d-e). (f) Percent control and *Itgb1*<sup>-/-</sup> cells with polarized Par3. More than 20 fibers and 50 cells were scored for each group; Student's  $t$ -test:  $*P < 0.05$ .

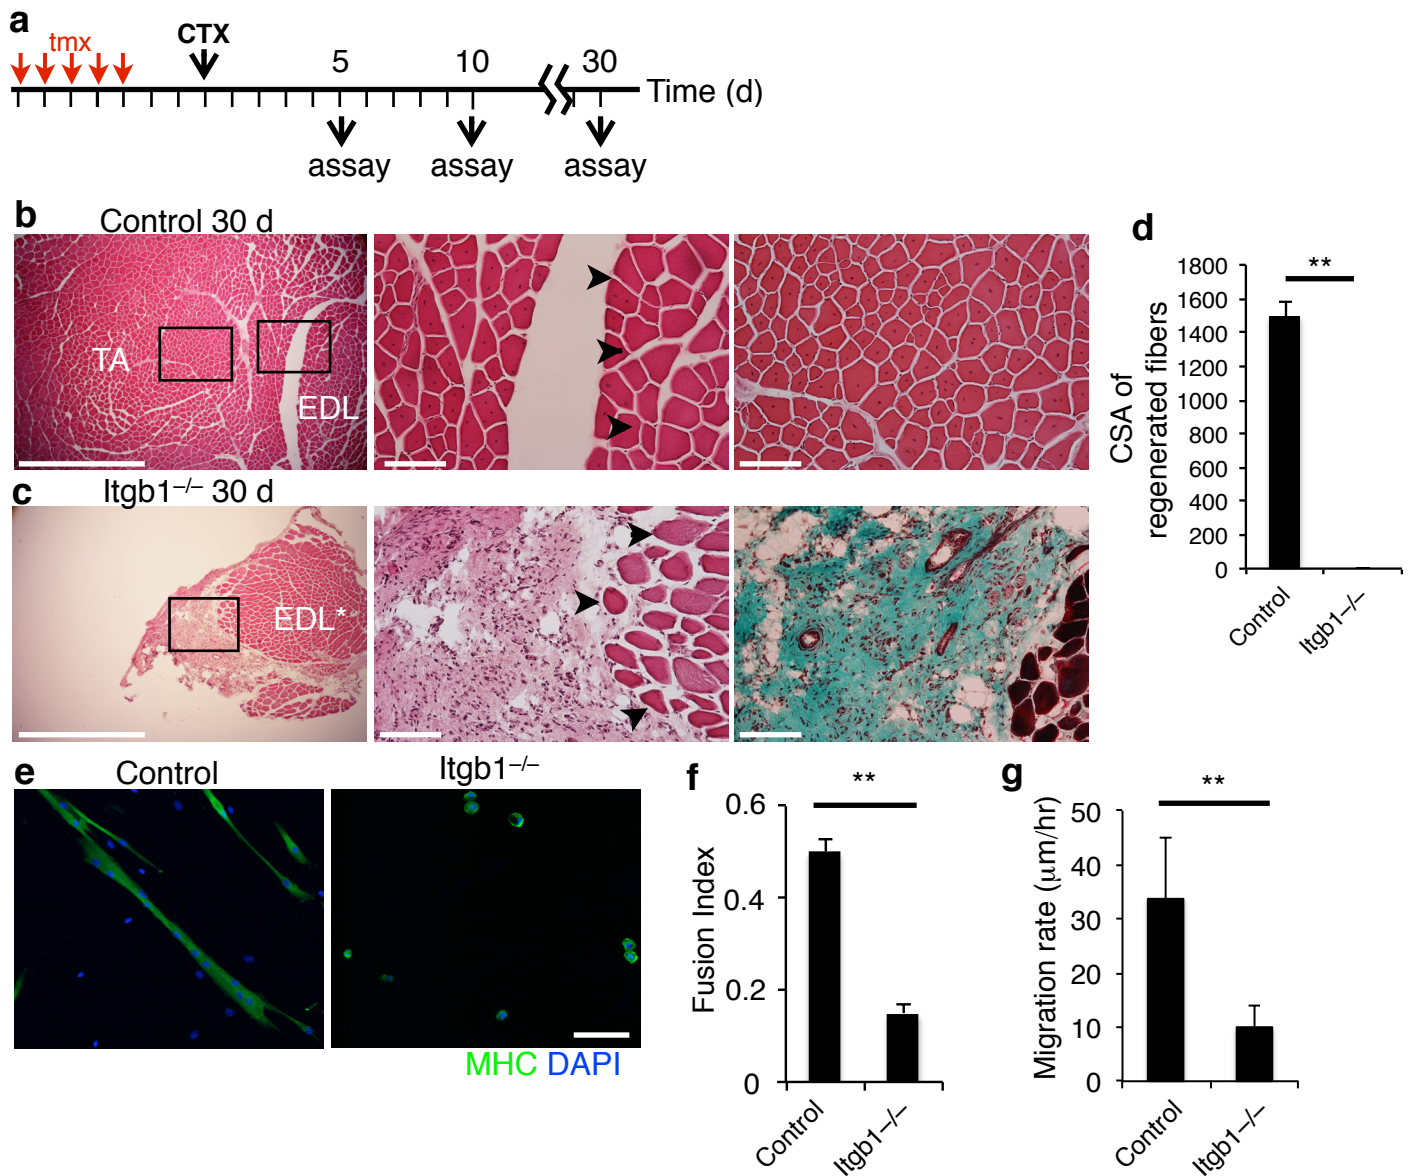

**Supplementary Fig. 3: *Itgb1*<sup>-/-</sup> mice are defective in the entire muscle regeneration process.** (a) The injury and regeneration assay scheme for Fig. 1g-i. (b) Control TA muscle at 30 d post injury by H&E stains at low (left) and high (right 2 images, boxed areas in the left image) magnifications; arrows indicate uninjured boundary. (c) Low (left) and high (middle, boxed area in the left image) magnifications of H&E stained *Itgb1*<sup>-/-</sup> muscle at 30 d after injury; arrows indicate the lack of central nuclei myofibers at the uninjured boundary. The right image is trichrome stain of a nearby section revealing extensive fibrosis (green area) next to uninjured muscle fibers (dark red).  $n = 3$  for each group. Scale bars = 1 mm in left 2 images and = 100  $\mu\text{m}$  in the high magnification images. (d) Cross sectional areas (CSA) of regenerated fibers of control and *Itgb1*<sup>-/-</sup> 30 d post injury. (e-g) *Itgb1*<sup>-/-</sup> cells are perpetuated by fusion and migration defects. (e, f) Control and *Itgb1*<sup>-/-</sup> YFP<sup>+</sup> SCs were cultured in differentiation media for 3 d, and stained with MHC and DAPI in (f) to determine fusion index (h); scale bar = 50  $\mu\text{m}$ . (g) Control and *Itgb1*<sup>-/-</sup> myoblasts were monitored live to measure migration velocities; numerical data = mean  $\pm$  s.d.,  $n = 3$  experiments; Student's *t*-test; \*\* $P < 0.01$ .

**a**

| Category | Number of differentially expressed genes | Number of up-regulated genes >2-fold | Percentage |
|----------|------------------------------------------|--------------------------------------|------------|
| 0hr      | 0                                        | —                                    | —          |
| 24hr     | 0                                        | —                                    | —          |
| 48hr     | 252                                      | 15                                   | 5.95%      |
| 72hr     | 627                                      | 304                                  | 48.48%     |

**b**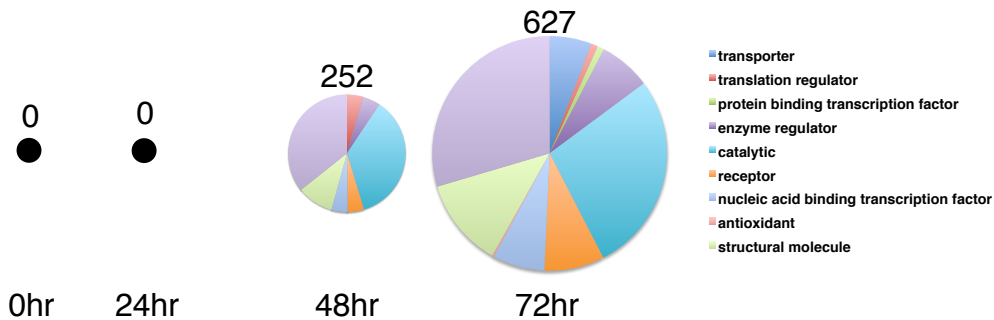**c**

| Upregulated   | gene            | control fpkm | itgb1 fpkm | log2(fold_change) | test_stat    | p_value    | q_value     | significant |
|---------------|-----------------|--------------|------------|-------------------|--------------|------------|-------------|-------------|
| 1             | <b>Ckm</b>      | 0            | 12.606     | 1.79769E+308      | 1.79769E+308 | 0.00034093 | 0.013169    | yes         |
| 2             | <b>Prss46</b>   | 0.0059601    | 6.20581    | 10.0241           | -3.79457     | 0.00014789 | 0.00692066  | yes         |
| 3             | <b>Cox8b</b>    | 0.041635     | 34.0536    | 9.67579           | -3.6481      | 0.00026419 | 0.0108326   | yes         |
| 4             | <b>Mfap4</b>    | 0.0143559    | 7.51532    | 9.03205           | -3.89013     | 0.00010019 | 0.00513513  | yes         |
| 5             | <b>Hrc</b>      | 0.0316929    | 9.26835    | 8.19201           | -5.08914     | 3.60E-07   | 5.18E-05    | yes         |
| 6             | <b>Slc5a5</b>   | 0.0269844    | 6.5643     | 7.92637           | -4.54134     | 5.59E-06   | 0.000513728 | yes         |
| 7             | <b>Dbh</b>      | 0.0380671    | 6.96503    | 7.51544           | -4.85841     | 1.18E-06   | 0.00013251  | yes         |
| 8             | <b>Mb</b>       | 0.767165     | 137.154    | 7.48204           | -6.40189     | 1.53E-10   | 5.38E-08    | yes         |
| 9             | <b>Trim72</b>   | 0.046796     | 5.87931    | 6.97312           | -3.87861     | 0.00010505 | 0.00534327  | yes         |
| 10            | <b>Csrp3</b>    | 0.351137     | 35.6742    | 6.6667            | -4.35297     | 1.34E-05   | 0.00101624  | yes         |
|               |                 |              |            |                   |              |            |             |             |
| Downregulated | gene            | control fpkm | itgb1 fpkm | log2(fold_change) | test_stat    | p_value    | q_value     | significant |
| 1             | <b>U90926</b>   | 14.8419      | 0.23332    | -5.99122          | 3.90069      | 9.59E-05   | 0.00495426  | yes         |
| 2             | <b>AA467197</b> | 17.842       | 0.529519   | -5.07445          | 3.46471      | 0.00053080 | 0.0180448   | yes         |
| 3             | <b>Basp1</b>    | 16.7405      | 0.65291    | -4.68031          | 4.6894       | 2.74E-06   | 0.00027873  | yes         |
| 4             | <b>Gm12603</b>  | 16.8879      | 0.751285   | -4.49048          | 3.96189      | 7.44E-05   | 0.00407537  | yes         |
| 5             | <b>Rpl35</b>    | 499.626      | 35.6063    | -3.81065          | 7.08494      | 1.39E-12   | 6.39E-10    | yes         |
| 6             | <b>Nrcam</b>    | 5.73605      | 0.448023   | -3.67841          | 5.59399      | 2.22E-08   | 4.93E-06    | yes         |
| 7             | <b>Tubb3</b>    | 6.96417      | 0.545219   | -3.67504          | 3.33631      | 0.00084899 | 0.0250857   | yes         |
| 8             | <b>Fabp5</b>    | 40.2442      | 3.1561     | -3.67256          | 5.0851       | 3.67E-07   | 5.18E-05    | yes         |
| 9             | <b>Psbm10</b>   | 10.7249      | 1.04097    | -3.36496          | 3.21931      | 0.001285   | 0.0339227   | yes         |
| 10            | <b>Peg10</b>    | 30.1804      | 3.26443    | -3.20871          | 7.75165      | 9.10E-15   | 6.07E-12    | yes         |

**Supplementary Fig. 4: RNA-seq data reveal that *Itgb1*<sup>-/-</sup> SCs display gene expression changes progressively over 72 h.** Tables (a, c) and pie charts (b) summarize results from RNA-seq analyses for Fig. 2g, comparing gene expression changes in mutant vs. control cells after culture in 10% horse serum growth media for 24, 48, and 72 h. (a) Differentially expressed genes were determined by Cuffdiff 2 to have significant q-values. (b) Schematic representation of (a). Functional categories provided by PANTHER. Similar gene categories represented between 48 and 72 h, although in different numbers. Pathway analyses did not uncover significant changes in relevant signaling pathways. (c) Top 10 Upregulated and Downregulated genes as determined by Cuffdiff 2, an algorithm that estimates expression at transcript-level resolution and controls for variability evident across replicate libraries. Genes were included only if one (control or *Itgb1*) had FPKM  $\geq 5$  to control for elevated fold changes of genes with minimal expression.

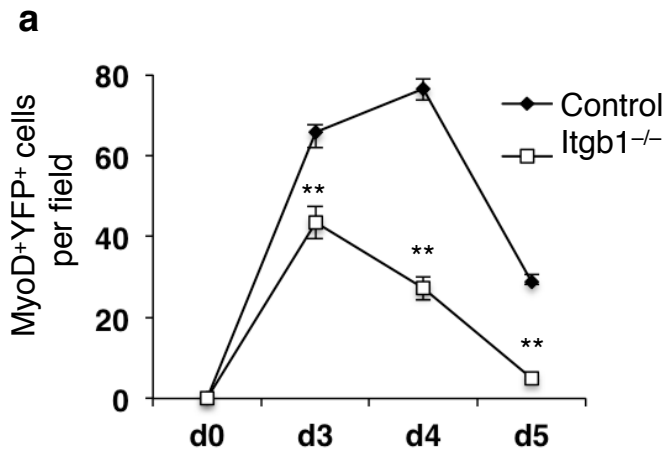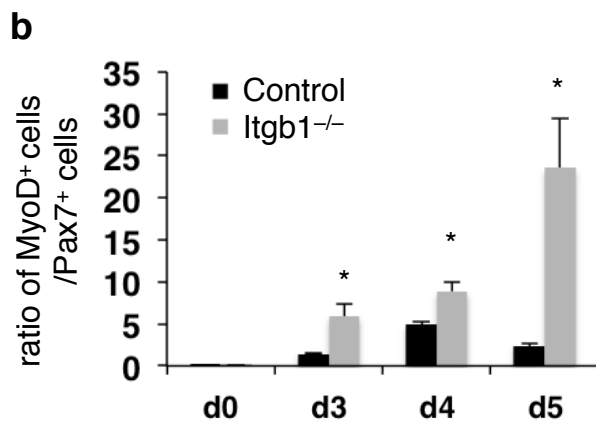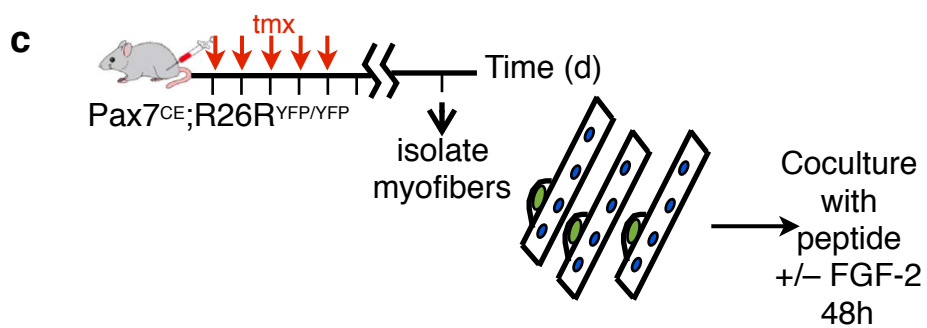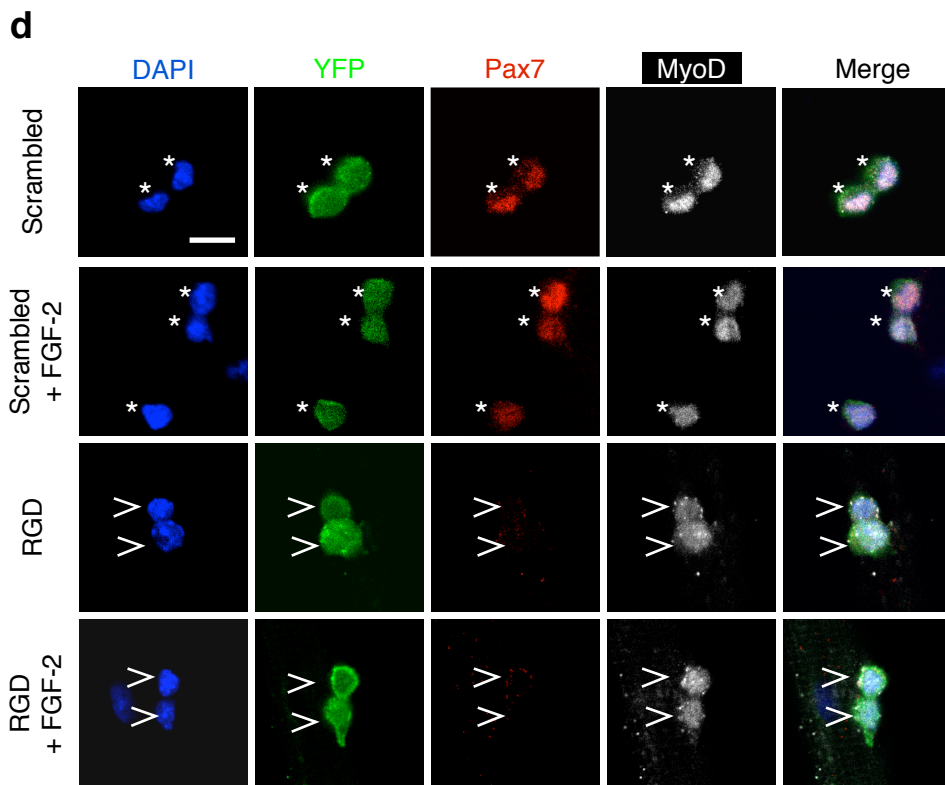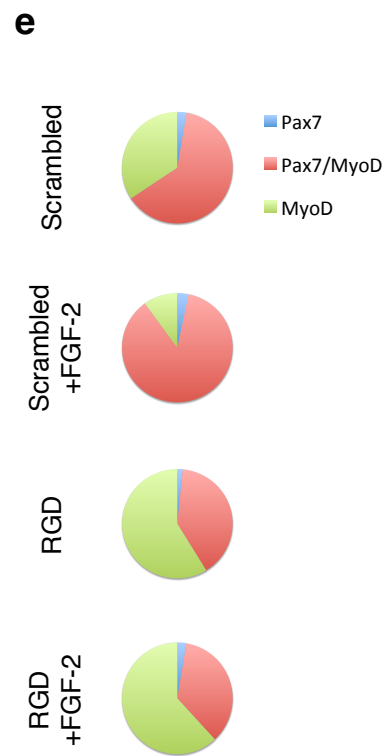

**Supplementary Fig. 5: *Itgb1*<sup>-/-</sup> SCs and control SCs treated with RGD peptide are prone to differentiation.** (a, b) are support data for **Fig. 2a**: (a) Average number of MyoD<sup>+</sup>YFP<sup>+</sup> cells per field (0.228 μm<sup>2</sup>) from the same samples in **Fig. 2a** through the course of regeneration. (b) Ratios of MyoD<sup>+</sup> versus Pax7<sup>+</sup> cells (in **Fig. 2b**). Data are expressed as mean ± s.e.m; Student's *t*-test: \**P* < 0.05; \*\**P* < 0.01; *n* = 3 animals per time point, 10 sections scored per animal. (c) Myofiber-associated control young YFP<sup>+</sup> SCs were cultured for 48 h with scrambled or RGD peptide and with or without FGF-2 and stained for Pax7 and MyoD. (d) SCs are self-renewed (Pax7<sup>+</sup>MyoD<sup>-</sup>), proliferating and self-renewable (Pax7<sup>+</sup>MyoD<sup>+</sup>; asterisk), or committed to differentiation (Pax7<sup>-</sup>MyoD<sup>+</sup>; open arrowhead); confocal images; scale bar = 10 μm. (e) Pie charts summarize data in (a); *n* ≥ 25 myofibers per condition; two-way ANOVA was used for paired comparison: *P* < 0.05, scrambled vs. scrambled + FGF-2 for Pax7<sup>-</sup>MyoD<sup>+</sup> and scrambled vs. RGD + FGF-2; not significant, RGD vs. RGD + FGF-2 for Pax7<sup>-</sup>MyoD<sup>+</sup>. RGD-peptide treatment caused SCs to fall off the myofiber over time, and therefore shorter time frame was used. In this context, there were very few Pax7<sup>+</sup>MyoD<sup>-</sup> cells. Our conclusion is based on Pax7<sup>+</sup>MyoD<sup>+</sup> fractions, as these cells have the potential to self-renew by turning off MyoD.

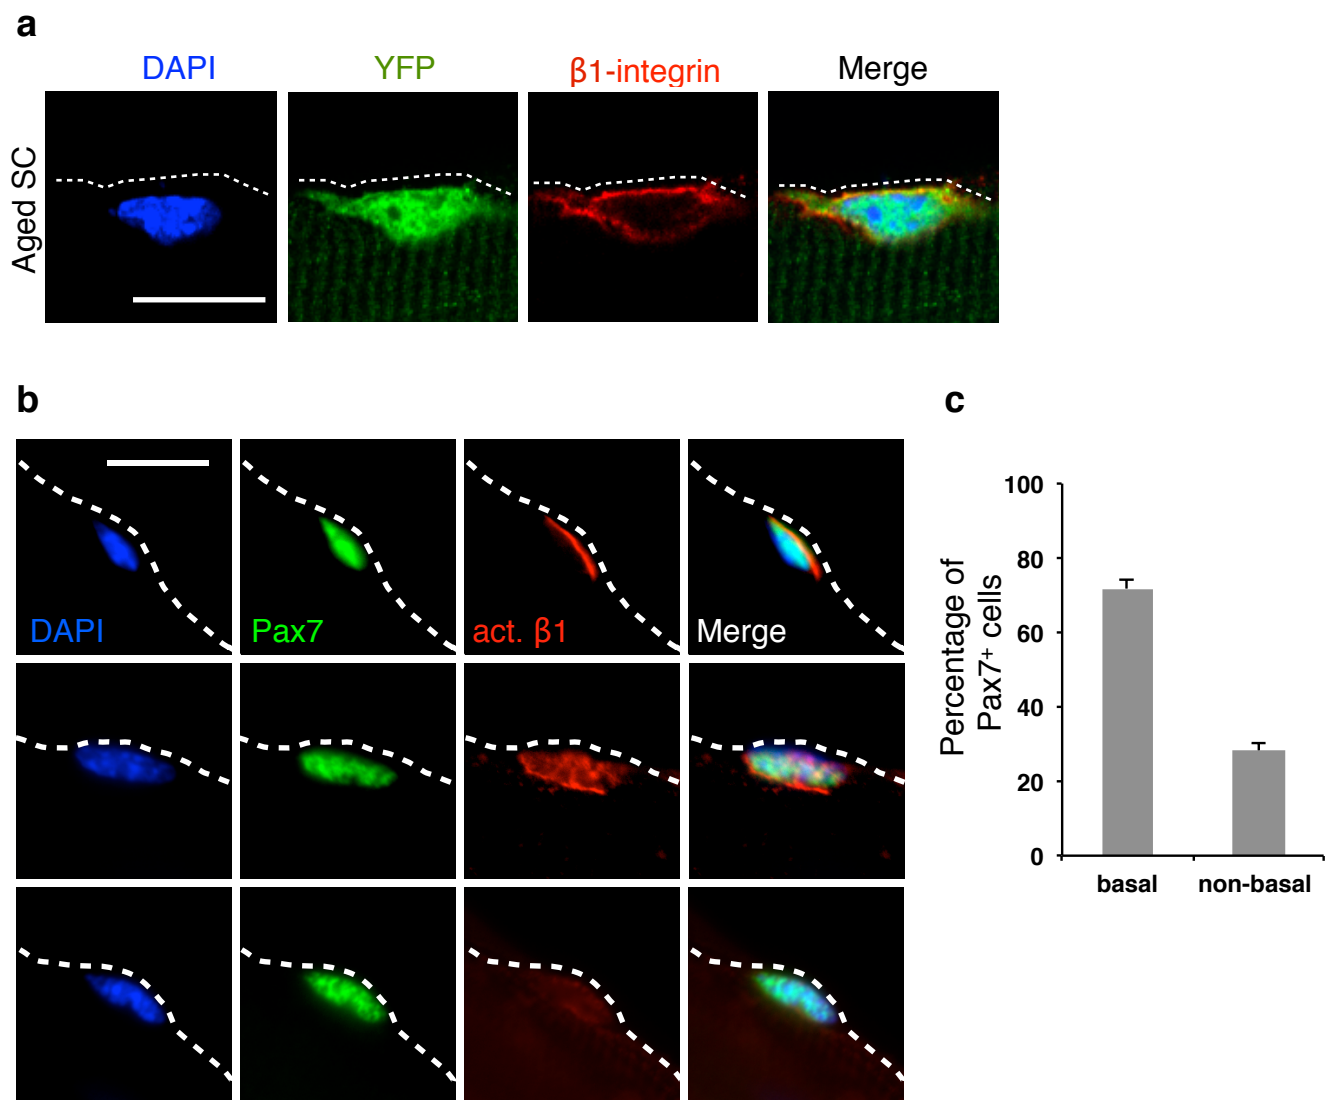

**Supplementary Fig. 6: Distribution of  $\beta 1$ -integrin in aged and dystrophic SCs.** (a) Aged SCs show laminar-localized pan  $\beta 1$ -integrin. YFP<sup>+</sup> myofiber-associated SCs of aged mice at 1 h after isolation stained for pan  $\beta 1$ -integrin. Localization pattern mirrors young control SCs stained for pan- $\beta 1$  integrin (Fig. 1a); dashed lines outline the basal side of the myofiber; scale bar = 10  $\mu$ m. (b, c) SCs on *mdx* myofibers have dysregulated  $\beta 1$ -integrin activity: (b) Pax7<sup>+</sup> SCs on myofibers after isolation from *mdx* mice show basally restricted (top) and non-basally restricted (middle and bottom) activated  $\beta 1$ -integrin (act.  $\beta 1$ ) patterns (same exposure time), compared to control (Fig. 4a, b, young SC). (c) Percentages of act.  $\beta 1$  displaying basal and non-basal pattern in the Pax7<sup>+</sup> SC population.



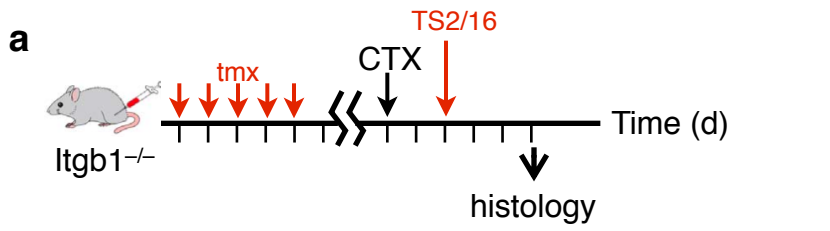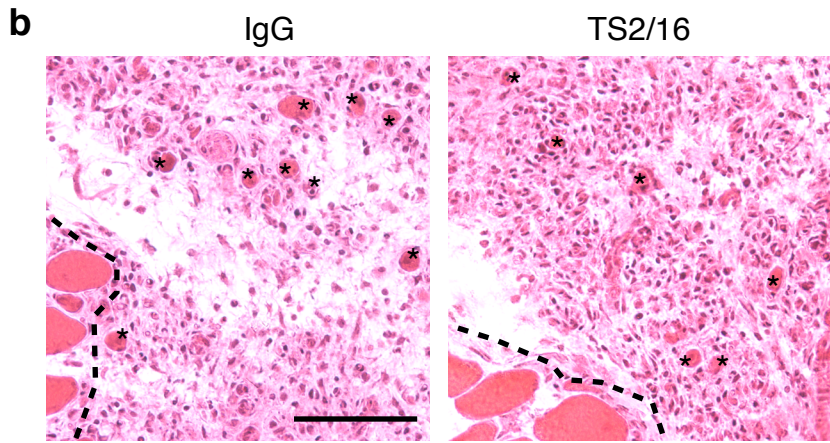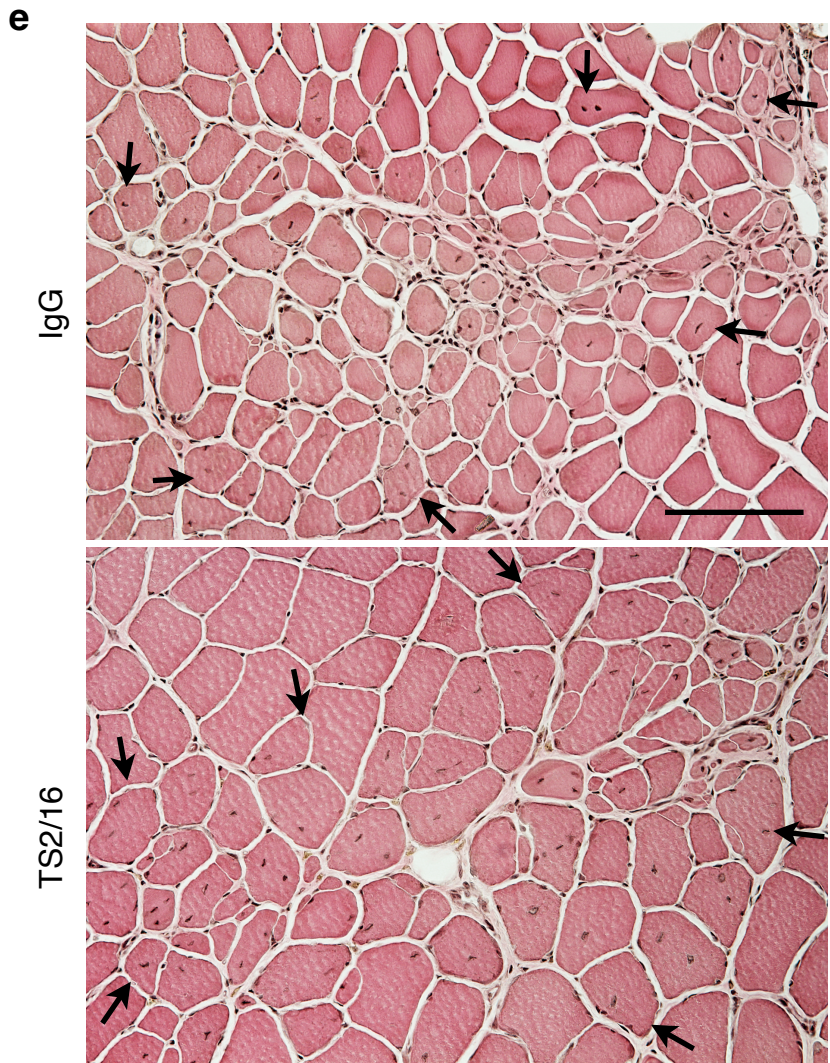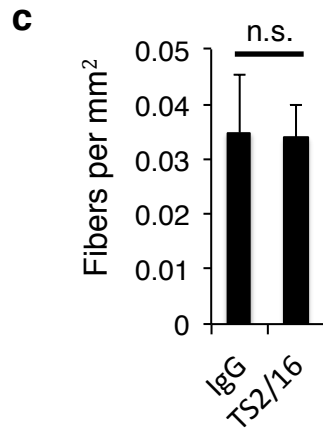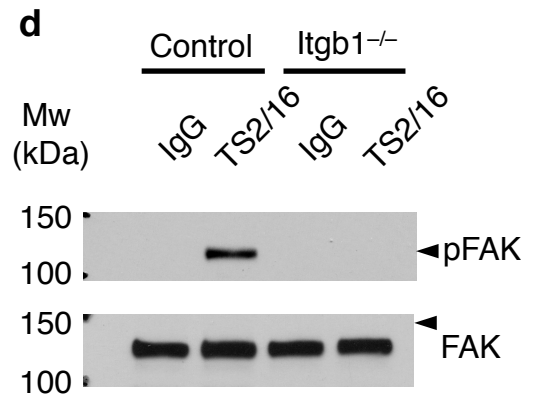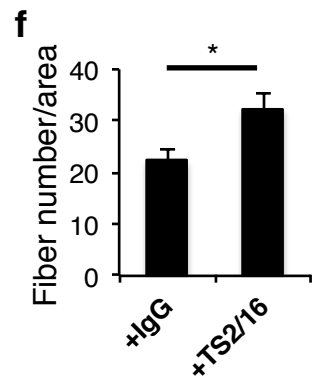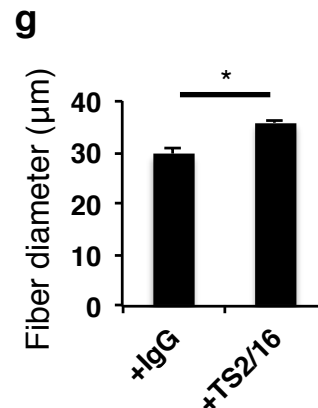

**Supplementary Fig. 7: TS2/16 specifically activates  $\beta$ 1-integrin and support long-term muscle regeneration:** (a-c) TS2/16 does not rescue the regeneration deficiency of *Itgb1*<sup>-/-</sup> muscle: (a) Tmx regimen, CTX injury, and TS2/16 injection scheme. 2 - 4 d post injury, 6 × 10  $\mu$ l injections into the injury site of either vehicle IgG or TS2/16 (10  $\mu$ g/ml). (b) TA muscles were harvested at 5 d post injury, and cross-sections were H&E stained; scale bar = 150  $\mu$ m. (c) Regeneration was quantified by central nuclei myofibers in the injured area. Data represent mean  $\pm$  s.e.m.; *n* = 3 animals per condition; ten sections per animal; one-way ANOVA: n.s., not significant. (d) TS2/16 activates FAK phosphorylation (pFAK) in control but not *Itgb1*<sup>-/-</sup> myoblasts. (e-g) TS2/16-enhanced aged muscle regeneration persists to 30 d post injury: (e) Representative images for IgG-treated (top) and TS2/16-treated (bottom) aged muscle sections 30 d after needle-track injury; arrows indicate boundaries of regenerative tracks; *n* = 4 animals for each group; scale bar = 100  $\mu$ m. (f, g) Average number of fibers (f) with centrally located nuclei per regenerative area (0.216 mm<sup>2</sup>) and average fiber diameters (g) of each group are presented as mean  $\pm$  sem; Student's *t* test: \**P* < 0.05.

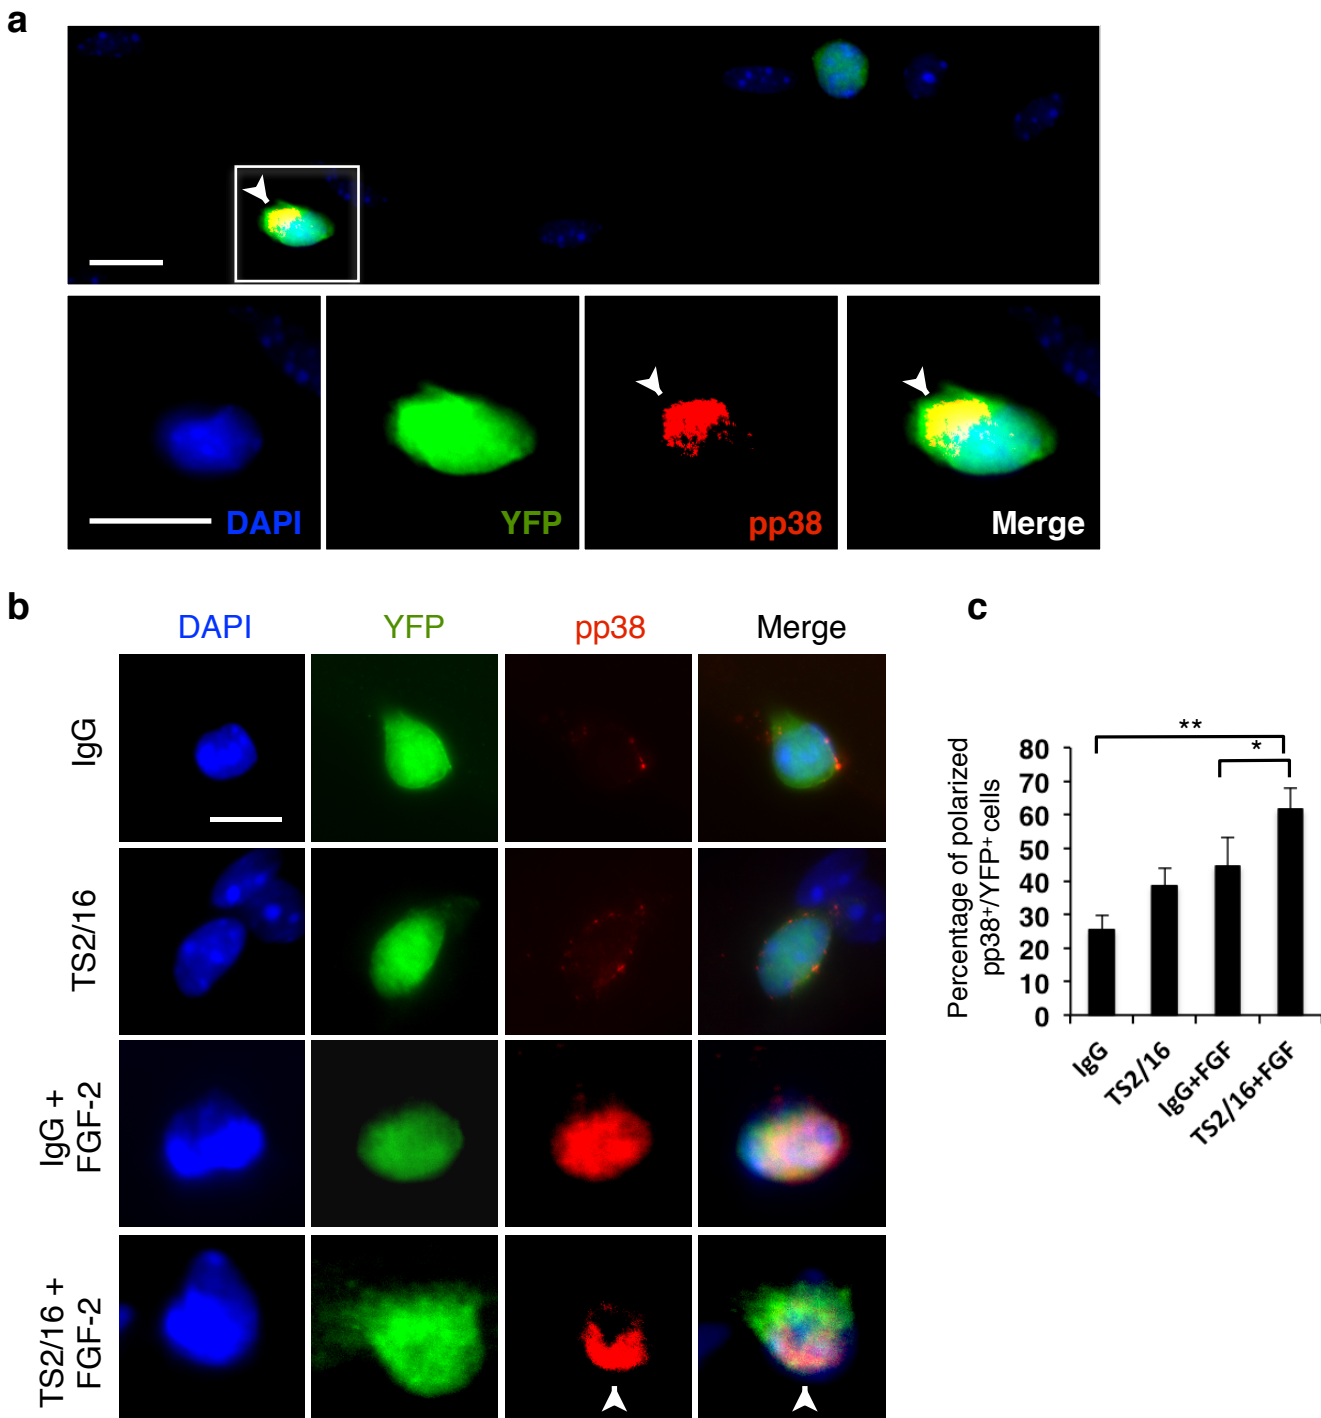

**Supplementary Fig. 8: TS2/16 and FGF-2 increase the fraction of aged SCs displaying polarized pp38.** (a) Two cells on a single myofiber show heterogeneity of pp38 staining between YFP-marked SCs for Fig. 2g. The cell in the inset shows polarized pp38, while the other shows none-to-minimal pp38 signal; scale bars = 10  $\mu$ m. (b) Additional single cell examples of various patterns of pp38 distribution in aged myofiber-associated lineage-marked YFP<sup>+</sup> SCs cultured for 30 h with control IgG or TS2/16 (10  $\mu$ g/ml), with or without FGF-2 (10 ng/ml); scale bar = 10  $\mu$ m. (c) Percentages of SCs with polarized pp38 (arrowhead in a and b); those with only a few puncta of pp38 signal were not counted as polarized;  $n = 3$  experimental replicates,  $\geq 25$  myofibers each condition per replicate; Student's  $t$ -test paired comparison: \* $P < 0.05$ , \*\* $P < 0.01$ .

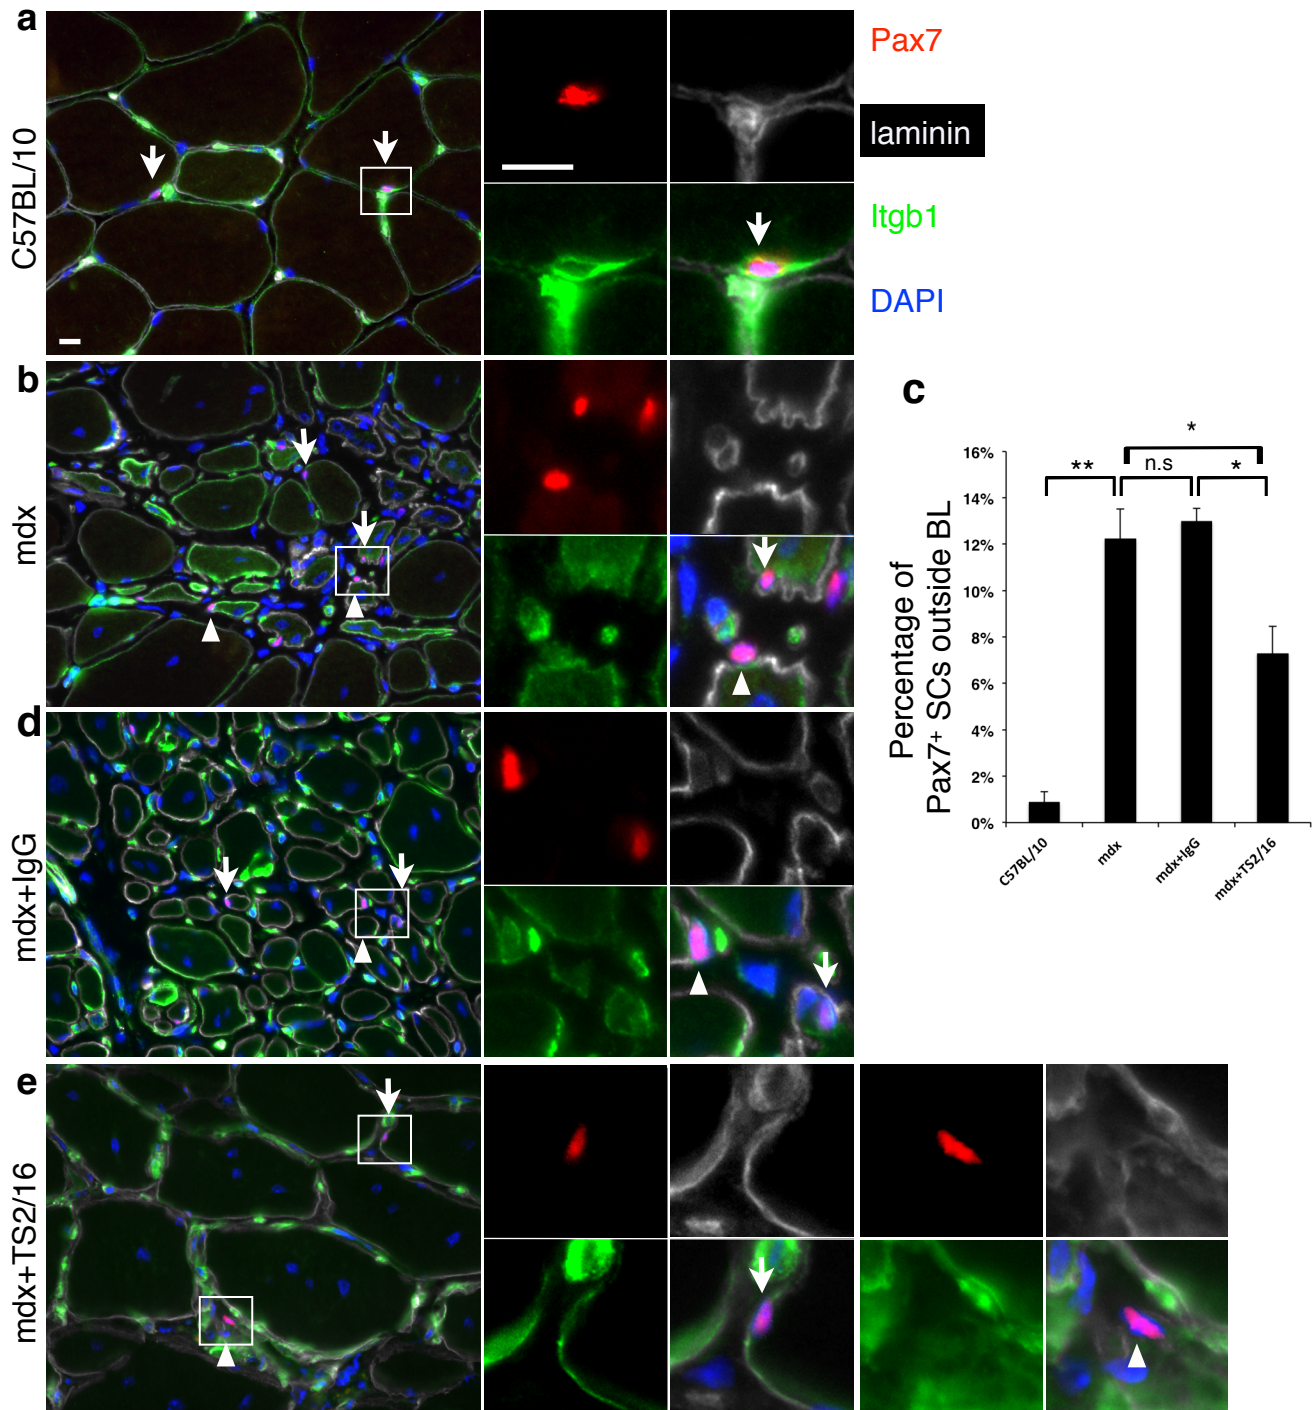

**Supplementary Fig. 9: TS2/16-treated *mdx* mice have reduced fraction of SCs outside the myofiber basal lamina.** (a) control C57/BL10 and (b) *mdx* TA muscles stained for Pax7, laminin, pan- $\beta$ 1-integrin, and DAPI; arrows, Pax7<sup>+</sup> SCs inside the myofiber laminin basal lamina (BL); arrowheads, Pax7<sup>+</sup> SCs outside the BL. (c) Percentages of Pax7<sup>+</sup> SCs outside the BL for all groups in (a, b, d, and e); n = 3 animals per group; > 100 SCs counted per group; Student's *t*-test, paired comparison: \**P* < 0.05, \*\**P* < 0.01, and n.s., not significant. (d) IgG-treated *mdx* and (e) TS2/16-treated *mdx* TA muscles stained and labeled as (a) and (b), and quantified in (c). Enlarged images for each inset in (a, b, d, and e) are to the left. (e) has two insets; images for the top inset is to the immediate right, and for the bottom inset, further right. Scale bars, 10  $\mu$ m.

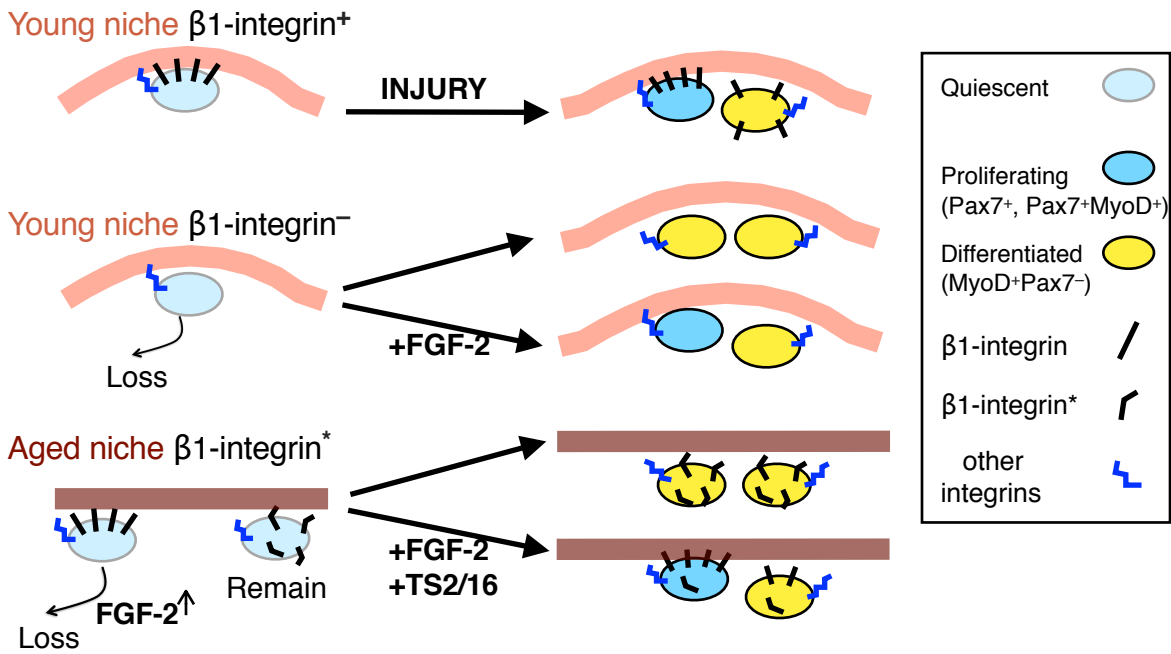

**Supplemental Fig. 10: Models for  $\beta 1$ -integrin function in young and aged SC niches.** Keys to the symbols are to the right. **Top panel:** Young SCs use  $\beta 1$ -integrin to sense and occupy the quiescent niche, and they can support injury-induced expansion and renewal. **Middle panel:**  $\beta 1$ -integrin mutant young SCs are prone to loss, and cannot support injury-induced expansion and renewal. FGF-2 partially rescues these defects in vitro, but unlikely to rescue the fusion defect to support regeneration in vivo. **Bottom panel:** During the aging process, SCs with sufficient overall integrin activity cooperate with increasing levels of FGF-2, break quiescence, and become lost. The remaining aged SCs with integrin dystroglycation, reflected by abnormal patterns of active  $\beta 1$ -integrin ( $\beta 1$ -integrin<sup>\*</sup>), are non-responsive to FGF-2, but can be rescued by TS2/16 and FGF-2.
